# Supplementary material
Source: publisher site journal article supplement (https://kjim.org/upload/media/kjim-2024-439-Supplementary-Fig-2.pdf)
Supplement: Supplementary file 1 [file kjim-2024-439-Supplementary-Fig-2.pdf]

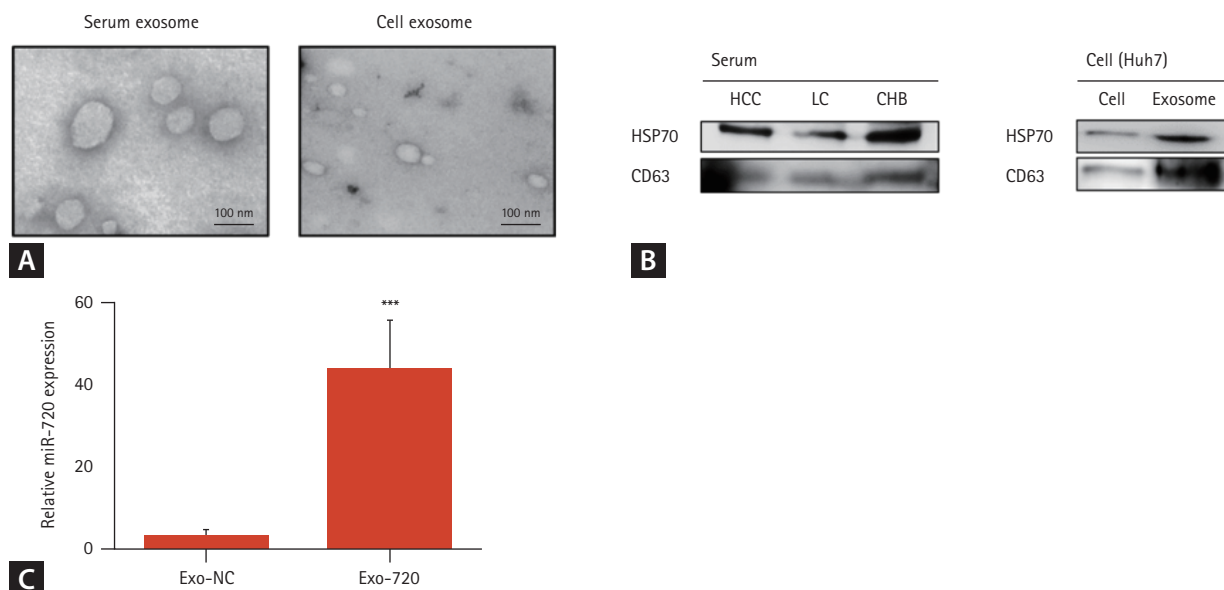

**Supplementary Figure 2.** Exosome characterization. (A) Imaging of exosomes using transmission electron microscopy. Scale bar, 100 nm. (B) Exosomes isolated from the patient's sera and CM were detected for exosome markers by Western blot assay. (C) The efficacy of miRNA transfection into exosomes was determined by qRT-PCR. CM, conditioned media; HCC, hepatocellular carcinoma; LC, liver cirrhosis; CHB, chronic hepatitis B; Exo-NC, exosomal miRNA mimic negative control; Exo-720, exosomal miRNA-720 mimic. \*\*\* $p < 0.001$ .
